# Supplementary material for: A fast and robust iterative algorithm for prediction of RNA pseudoknotted secondary structures
Source: PubMed Central journal article supplement (PMC4064103; doi:10.1186/1471-2105-15-147), 2014-05-18
Supplement: 1471-2105-15-147-S1.pdf [file 1471-2105-15-147-S1.pdf]

## ADDITIONAL FILE 1 — ITERATIVE HFOLD PSEUDOCODE

### PSEUDOCODE

Following is the pseudocode of Iterative HFold's algorithm.

---

**Algorithm 0.1:** ITERATIVE HFOLD (Sequence  $S$ , Structure  $G$ )

---

**comment:** Run methods 1-4 and choose the lowest energy structure

$(G_1, E1) \leftarrow \text{method1}(S, G)$

$G_{final} \leftarrow G_1$

$E_{final} \leftarrow E1$

$(G_2, E2) \leftarrow \text{method2}(S, G)$

**if**  $(E2 < E_{final})$

**then**  $\begin{cases} G_{final} \leftarrow G_2 \\ E_{final} \leftarrow E2 \end{cases}$

$(G_3, E3) \leftarrow \text{method3}(S, G)$

**if**  $(E3 < E_{final})$

**then**  $\begin{cases} G_{final} \leftarrow G_3 \\ E_{final} \leftarrow E3 \end{cases}$

$(G_4, E4) \leftarrow \text{method1}(S, G)$

**if**  $(E4 < E_{final})$

**then**  $\begin{cases} G_{final} \leftarrow G_4 \\ E_{final} \leftarrow E4 \end{cases}$

**return**  $(G_{final}, E_{final})$

---

---

**Algorithm 0.2:** METHOD1(Sequence  $S$ , Structure  $G$ )

---

**comment:** Run HFold and return results

**return**  $(HFold(S, G))$

---

---

**Algorithm 0.3:** METHOD2(Sequence  $S$ , Structure  $G$ )

---

```

( $G_1, E1$ )  $\leftarrow$  HFold-PKonly( $S, G$ )
if ( $G_1$  is empty structure)
  then return ( $G$ )

  else  $\left\{ \begin{array}{l} G' \leftarrow (G_1 - G) \\ \textbf{return} \text{ (method1}(S, G')) \end{array} \right.$ 

```

---



---

**Algorithm 0.4:** METHOD3(Sequence  $S$ , Structure  $G$ )

---

```

procedure OBTAINRELAXEDSTEMS( $G1, G2$ )
   $G_{result} \leftarrow G1$ 
  for each ( $i.j \in G2$ )
    do
      if  $i.j \notin G1$ 
        then  $\left\{ \begin{array}{l} \textbf{comment: extend stems of } G1 \\ \textbf{if } ((i-1).(j+1) \textbf{ or } (i+1).(j-1)) \in G1 \\ \textbf{then } G_{result} \leftarrow G_{result} \cup i.j \\ \textbf{comment: include bulges of size 1} \\ \\ \textbf{else if } ((i-2).(j+1) \textbf{ or } (i-1).(j+2) \textbf{ or } (i+1).(j-2) \textbf{ or } (i+2).(j-1)) \in G1 \\ \textbf{then } G_{result} \leftarrow G_{result} \cup i.j \\ \textbf{comment: include loops of size } 1 \times 1 \\ \\ \textbf{else if } ((i-2).(j+2) \textbf{ or } (i+2).(j-2)) \in G1 \\ \textbf{then } G_{result} \leftarrow G_{result} \cup i.j \\ \textbf{comment: include loops of size } 1 \times 2 \textbf{ or } 2 \times 1 \\ \\ \textbf{else if } ((i-3).(j+2) \textbf{ or } (i-2).(j+3) \textbf{ or } (i+2).(j-3) \textbf{ or } (i+3).(j-2)) \in G1 \\ \textbf{then } G_{result} \leftarrow G_{result} \cup i.j \end{array} \right.$ 
      return ( $G_{result}$ )

```

```

main
   $G' \leftarrow$  SimFold( $S, G$ )
   $G_{updated} \leftarrow$  OBTAINRELAXEDSTEMS( $G, G'$ )
  return (method2( $S, G_{updated}$ ))

```

---

---

**Algorithm 0.5:** METHOD4(Sequence  $S$ , Structure  $G$ )

---

$k \leftarrow 1$   
 $G_{updated} \leftarrow G$   
**for each** disjoint substructure  $G_k$  in  $G$   
  **do**  
   $S_k \leftarrow$  subsequence of  $S$  corresponding to  $G_k$   
   $G'_k \leftarrow \text{SimFold}(S_k, G_k)$   
   $G'_{k,updated} \leftarrow \text{OBTAINRELAXEDSTEMS}(G_k, G'_k)$   
   $G_{updated} \leftarrow G_{updated} \cup G'_{k,updated}$   
**return** (method2( $S, G_{updated}$ ))

---
