# Supplementary material for: A fast and robust iterative algorithm for prediction of RNA pseudoknotted secondary structures
Source: PubMed Central journal article supplement (PMC4064103; doi:10.1186/1471-2105-15-147), 2014-05-18
Supplement: 1471-2105-15-147-S2.pdf [file 1471-2105-15-147-S2.pdf]

## ADDITIONAL FILE 2 — IPKNOT DETAILED PERFORMANCE

### IPKNOT PERFORMANCE

TABLE 1. Comparison of bootstrap 95% percentile confidence interval of average F-measure of IPknot with different default settings.

| input data set | no refinement                     |                                   |                                    |                                   | refinement (1 iteration)          |                                   |                                    |                                   |
|----------------|-----------------------------------|-----------------------------------|------------------------------------|-----------------------------------|-----------------------------------|-----------------------------------|------------------------------------|-----------------------------------|
|                | $\gamma_1 = 1,$<br>$\gamma_2 = 1$ | $\gamma_1 = 2,$<br>$\gamma_2 = 4$ | $\gamma_1 = 2,$<br>$\gamma_2 = 16$ | $\gamma_1 = 4,$<br>$\gamma_2 = 8$ | $\gamma_1 = 1,$<br>$\gamma_2 = 1$ | $\gamma_1 = 2,$<br>$\gamma_2 = 4$ | $\gamma_1 = 2,$<br>$\gamma_2 = 16$ | $\gamma_1 = 4,$<br>$\gamma_2 = 8$ |
| HK - PKed      | (40.70, 54.82)                    | (53.27, 65.91)                    | (57.31, 69.41)                     | (54.67, 66.07)                    | (50.63, 66.80)                    | (57.88, 71.53)                    | (59.06, 72.02)                     | (56.52, 69.26)                    |
| HK - PK free   | (38.04, 40.42)                    | (39.35, 41.54)                    | (38.88, 40.97)                     | (77.31, 81.72)                    | (32.52, 36.34)                    | (37.42, 39.95)                    | (36.19, 38.60)                     | (37.18, 39.49)                    |
| pk168          | (47.00, 56.66)                    | (56.86, 64.81)                    | (60.73, 68.87)                     | (58.17, 66.16)                    | (58.53, 68.93)                    | (66.31, 75.39)                    | (65.98, 75.00)                     | (64.10, 73.20)                    |
| DK-pk16        | (64.90, 74.50)                    | (66.22, 77.80)                    | (66.70, 79.15)                     | (65.44, 75.74)                    | (51.57, 79.59)                    | (55.99, 78.76)                    | (55.22, 77.84)                     | (62.16, 76.88)                    |
