# Supplementary material for: A fast and robust iterative algorithm for prediction of RNA pseudoknotted secondary structures
Source: PubMed Central journal article supplement (PMC4064103; doi:10.1186/1471-2105-15-147), 2014-05-18
Supplement: 1471-2105-15-147-S4.pdf [file 1471-2105-15-147-S4.pdf]

## ADDITIONAL FILE 4 — TIME AND MEMORY COMPARISON

### TIME COMPARISON

Tables 1 and 2 provide complete data presenting running time comparison of HFold, Iterative HFold, HotKnots V2.0 and IPknot on HK-PK data set. The tables also show required time to get Hotspots as input structure to HFold and Iterative HFold. Timing is presented in seconds.

### MEMORY COMPARISON

Tables 3 and 4 provide complete data presenting memory (total heap usage) comparison of HFold, Iterative HFold, HotKnots V2.0 and IPknot on HK-PK data set. Memory usage is presented in Mega Bytes.

TABLE 1. Running time comparison

| Name                 | Len. | Time (S) |             |          |          |        |
|----------------------|------|----------|-------------|----------|----------|--------|
|                      |      | HFold    | Iter. HFold | HotKnots | Hotspots | IPknot |
| A.tum.RNaseP         | 400  | 1.47     | 5.81        | 6041.40  | 0.41     | 0.72   |
| tobacco-mosaic-virus | 214  | 0.40     | 5.57        | 3404.73  | 0.23     | 0.19   |
| telo.human           | 210  | 0.63     | 4.43        | 181.68   | 0.22     | 0.20   |
| TMR-00009            | 196  | 0.40     | 8.27        | 233.82   | 0.22     | 0.16   |
| ASE-00131            | 195  | 0.30     | 1.21        | 203.12   | 0.22     | 0.14   |
| ASE-00360            | 195  | 0.33     | 8.22        | 1665.94  | 0.22     | 0.15   |
| ASE-00429            | 189  | 0.29     | 3.18        | 567.86   | 0.22     | 0.13   |
| CRW-00659            | 170  | 0.27     | 4.68        | 72.71    | 0.21     | 0.12   |
| CRW-00641            | 168  | 0.24     | 5.26        | 53.05    | 0.21     | 0.12   |
| CRW-00611            | 167  | 0.24     | 4.39        | 532.22   | 0.21     | 0.09   |
| CRW-00687            | 153  | 0.20     | 3.83        | 36.05    | 0.21     | 0.09   |
| TMR-00047            | 130  | 0.27     | 2.05        | 31.39    | 0.20     | 0.07   |
| Coxsackie            | 114  | 0.15     | 0.64        | 7.84     | 0.20     | 0.05   |
| TMV.R                | 105  | 0.15     | 1.68        | 19.73    | 0.20     | 0.04   |
| HDV-anti             | 91   | 0.15     | 1.19        | 11.50    | 0.20     | 0.04   |
| RFA-00632            | 91   | 0.15     | 0.81        | 10.74    | 0.20     | 0.03   |
| RFA-00636            | 90   | 0.15     | 0.81        | 4.03     | 0.20     | 0.03   |
| HDV                  | 87   | 0.14     | 0.79        | 4.98     | 0.20     | 0.03   |
| TYMV                 | 86   | 0.14     | 1.20        | 9.95     | 0.20     | 0.03   |
| TMV.L                | 84   | 0.15     | 1.10        | 10.53    | 0.19     | 0.03   |
| CSFV-IRES            | 76   | 0.14     | 1.08        | 2.64     | 0.20     | 0.02   |
| BVDV-IRES            | 73   | 0.13     | 1.07        | 1.42     | 0.19     | 0.02   |
| CoxB3                | 73   | 0.13     | 1.03        | 1.22     | 0.19     | 0.02   |
| satRPV               | 73   | 0.13     | 1.03        | 6.67     | 0.19     | 0.02   |
| PDB-01009            | 71   | 0.13     | 0.56        | 2.43     | 0.19     | 0.03   |
| SARS-CoV             | 69   | 0.13     | 1.01        | 1.93     | 0.20     | 0.02   |
| PDB-01021            | 68   | 0.13     | 0.56        | 1.02     | 0.20     | 0.02   |
| PDB-01023            | 68   | 0.13     | 0.55        | 1.24     | 0.20     | 0.02   |
| EC-S15               | 67   | 0.14     | 1.01        | 2.87     | 0.20     | 0.02   |
| PDB-00944            | 65   | 0.13     | 0.55        | 1.27     | 0.20     | 0.02   |
| Tt-LSU-P3P7          | 65   | 0.18     | 0.56        | 1.88     | 0.20     | 0.02   |
| HCV-229E             | 61   | 0.13     | 0.96        | 1.05     | 0.19     | 0.02   |
| PRRSV-16244B         | 58   | 0.13     | 0.97        | 2.29     | 0.19     | 0.02   |
| PRRSV-LV             | 58   | 0.13     | 0.95        | 1.44     | 0.19     | 0.01   |
| HCV-Ires             | 56   | 0.12     | 0.54        | 1.47     | 0.19     | 0.01   |
| Ec-PK4               | 52   | 0.12     | 0.93        | 0.89     | 0.20     | 0.01   |
| AKV-MuLV             | 50   | 0.18     | 1.22        | 1.54     | 0.21     | 0.01   |
| BaEV                 | 50   | 0.19     | 0.93        | 1.37     | 0.19     | 0.01   |
| Cas-Br-E-MuLV        | 50   | 0.12     | 0.92        | 1.47     | 0.19     | 0.01   |
| FeLV                 | 50   | 0.13     | 0.91        | 1.57     | 0.19     | 0.01   |
| SNV                  | 50   | 0.13     | 0.67        | 1.04     | 0.19     | 0.01   |
| GaLV                 | 49   | 0.13     | 0.92        | 1.44     | 0.19     | 0.01   |
| Hs-SRP-pkn           | 47   | 0.12     | 0.53        | 2.80     | 0.20     | 0.01   |

TABLE 2. Running time comparison - Continued

| Name          | Len. | Time (S) |             |          |          |        |
|---------------|------|----------|-------------|----------|----------|--------|
|               |      | HFold    | Iter. HFold | HotKnots | Hotspots | IPknot |
| Bt-PrP        | 45   | 0.13     | 0.91        | 1.21     | 0.19     | 0.01   |
| HIV-1-RT-2-3a | 45   | 0.12     | 0.66        | 0.34     | 0.19     | 0.01   |
| Hs-Prp        | 45   | 0.13     | 0.79        | 0.76     | 0.20     | 0.01   |
| minimalIBV    | 45   | 0.12     | 0.91        | 0.70     | 0.20     | 0.01   |
| HIV-1-RT-2-2b | 42   | 0.13     | 0.90        | 0.26     | 0.19     | 0.01   |
| HIV-1-RT-2-6b | 42   | 0.12     | 0.90        | 0.29     | 0.19     | 0.01   |
| Ni-VS         | 42   | 0.12     | 0.91        | 0.47     | 0.19     | 0.01   |
| HIV-1-RT-2-5a | 41   | 0.12     | 0.90        | 0.42     | 0.19     | 0.01   |
| HIV-1-RT-1-8  | 39   | 0.12     | 0.78        | 0.24     | 0.19     | 0.01   |
| HIV-1-RT-2-1b | 39   | 0.12     | 0.90        | 0.26     | 0.19     | 0.01   |
| SRV-1         | 38   | 0.12     | 0.90        | 0.86     | 0.19     | 0.01   |
| TMV-L         | 38   | 0.13     | 0.78        | 1.32     | 0.19     | 0.01   |
| HIV-1-RT-1-1  | 37   | 0.13     | 0.90        | 0.33     | 0.19     | 0.01   |
| HIV-1-RT-1-17 | 37   | 0.12     | 0.90        | 0.33     | 0.19     | 0.01   |
| HIV-1-RT-1-3a | 37   | 0.12     | 0.90        | 0.36     | 0.20     | 0.01   |
| HIV-1-RT-1-6  | 37   | 0.12     | 0.90        | 0.34     | 0.19     | 0.01   |
| HIV-1-RT-1-7  | 37   | 0.12     | 0.90        | 0.28     | 0.19     | 0.01   |
| HIV-1-RT-1-9b | 37   | 0.12     | 0.90        | 0.39     | 0.19     | 0.01   |
| HIV-1-RT-2-10 | 37   | 0.12     | 0.90        | 0.35     | 0.19     | 0.01   |
| HIV-1-RT-2-11 | 37   | 0.12     | 0.90        | 0.27     | 0.19     | 0.01   |
| HIV-1-RT-2-12 | 37   | 0.12     | 0.78        | 0.27     | 0.19     | 0.01   |
| HIV-1-RT-2-4a | 37   | 0.12     | 0.89        | 0.40     | 0.20     | 0.01   |
| HIV-1-RT-2-7a | 36   | 0.12     | 0.89        | 0.30     | 0.19     | 0.01   |
| pKA-A         | 36   | 0.12     | 0.65        | 0.42     | 0.19     | 0.01   |
| EIAV          | 35   | 0.12     | 0.89        | 0.37     | 0.19     | 0.01   |
| FIV           | 35   | 0.12     | 0.89        | 0.30     | 0.19     | 0.01   |
| HIVRT32       | 35   | 0.12     | 0.89        | 0.31     | 0.20     | 0.01   |
| HIVRT322      | 35   | 0.12     | 0.89        | 0.40     | 0.20     | 0.01   |
| HIVRT33       | 35   | 0.12     | 0.89        | 0.32     | 0.19     | 0.01   |
| HIV-1-RT-2-9  | 34   | 0.12     | 0.89        | 0.27     | 0.19     | 0.01   |
| MMTV          | 34   | 0.12     | 0.89        | 0.71     | 0.19     | 0.01   |
| MMTV-vpk      | 34   | 0.12     | 0.89        | 0.34     | 0.19     | 0.01   |
| MMTVgag-pro   | 34   | 0.12     | 0.89        | 0.95     | 0.19     | 0.01   |
| T2-gene32     | 33   | 0.12     | 0.65        | 0.26     | 0.19     | 0.01   |
| Ec-PK1        | 30   | 0.12     | 0.89        | 0.31     | 0.20     | 0.01   |
| LP-PK1        | 30   | 0.12     | 0.89        | 0.24     | 0.19     | 0.01   |
| BWYV          | 28   | 0.12     | 0.88        | 0.31     | 0.19     | 0.01   |
| PEMV          | 28   | 0.12     | 0.89        | 0.25     | 0.19     | 0.01   |
| T4-gene32     | 28   | 0.12     | 0.89        | 0.26     | 0.19     | 0.01   |
| BLV           | 27   | 0.12     | 0.52        | 0.31     | 0.19     | 0.01   |
| BYDV-NY-RPV   | 27   | 0.12     | 0.88        | 0.30     | 0.19     | 0.01   |
| CABYV         | 27   | 0.12     | 0.88        | 0.27     | 0.19     | 0.01   |
| BChV          | 26   | 0.12     | 0.88        | 0.27     | 0.19     | 0.01   |
| PLRV-S        | 26   | 0.12     | 0.88        | 0.29     | 0.19     | 0.01   |
| PLRV-W        | 26   | 0.12     | 0.88        | 0.29     | 0.19     | 0.01   |

TABLE 3. Memory usage comparison

| Name                 | Len. | Memory (MB) |             |          |        |
|----------------------|------|-------------|-------------|----------|--------|
|                      |      | HFold       | Iter. HFold | HotKnots | IPknot |
| A.tum.RNaseP         | 400  | 61.33       | 61.33       | 93419.00 | 5.49   |
| tobacco-mosaic-virus | 214  | 53.85       | 53.85       | 44241.76 | 2.10   |
| telo.human           | 210  | 53.71       | 53.71       | 8355.85  | 2.05   |
| TMR-00009            | 196  | 53.25       | 53.25       | 11833.91 | 1.81   |
| ASE-00131            | 195  | 53.21       | 53.21       | 12805.66 | 1.76   |
| ASE-00360            | 195  | 53.21       | 53.21       | 55708.86 | 1.94   |
| ASE-00429            | 189  | 53.02       | 53.02       | 28543.33 | 1.77   |
| CRW-00659            | 170  | 52.42       | 52.42       | 4175.79  | 1.44   |
| CRW-00641            | 168  | 52.36       | 52.36       | 3503.01  | 1.44   |
| CRW-00611            | 167  | 52.33       | 52.33       | 26824.57 | 1.42   |
| CRW-00687            | 153  | 51.91       | 51.91       | 3387.13  | 1.26   |
| TMR-00047            | 130  | 51.24       | 51.24       | 2730.81  | 1.01   |
| Coxsackie            | 114  | 50.80       | 50.80       | 969.34   | 0.84   |
| TMV.R                | 105  | 50.56       | 50.56       | 2354.81  | 0.78   |
| HDV-anti             | 91   | 50.20       | 50.20       | 1707.54  | 0.90   |
| RFA-00632            | 91   | 50.20       | 50.20       | 1528.68  | 0.78   |
| RFA-00636            | 90   | 50.17       | 50.17       | 634.52   | 0.70   |
| HDV                  | 87   | 50.10       | 50.10       | 755.96   | 0.68   |
| TYMV                 | 86   | 50.07       | 50.07       | 1478.82  | 0.62   |
| TMV.L                | 84   | 50.02       | 50.02       | 1455.98  | 0.57   |
| CSFV-IRES            | 76   | 49.82       | 49.82       | 457.97   | 0.52   |
| BVDV-IRES            | 73   | 49.75       | 49.75       | 252.15   | 0.50   |
| CoxB3                | 73   | 49.75       | 49.75       | 245.71   | 0.48   |
| satRPV               | 73   | 49.75       | 49.75       | 1141.53  | 0.49   |
| PDB-01009            | 71   | 49.70       | 49.70       | 431.24   | 1.01   |
| SARS-CoV             | 69   | 49.66       | 49.66       | 357.78   | 0.47   |
| PDB-01021            | 68   | 49.63       | 49.63       | 197.48   | 0.45   |
| PDB-01023            | 68   | 49.63       | 49.63       | 268.22   | 0.45   |
| EC-S15               | 67   | 49.61       | 49.61       | 534.31   | 0.44   |
| PDB-00944            | 65   | 49.56       | 49.56       | 261.16   | 0.44   |
| Tt-LSU-P3P7          | 65   | 49.56       | 49.56       | 418.68   | 0.41   |
| HCV-229E             | 61   | 49.47       | 49.47       | 213.69   | 0.41   |
| PRRSV-16244B         | 58   | 49.40       | 49.40       | 462.97   | 0.39   |
| PRRSV-LV             | 58   | 49.40       | 49.40       | 322.98   | 0.39   |
| HCV-Ires             | 56   | 49.35       | 49.35       | 329.64   | 0.38   |
| Ec-PK4               | 52   | 49.26       | 49.26       | 213.75   | 0.33   |
| AKV-MuLV             | 50   | 49.21       | 49.21       | 335.54   | 0.4    |
| BaEV                 | 50   | 49.21       | 49.21       | 285.20   | 0.36   |
| Cas-Br-E-MuLv        | 50   | 49.21       | 49.21       | 328.05   | 0.40   |
| FeLV                 | 50   | 49.21       | 49.21       | 359.76   | 0.34   |
| SNV                  | 50   | 49.21       | 49.21       | 221.59   | 0.34   |
| GaLV                 | 49   | 49.19       | 49.19       | 281.26   | 0.30   |
| Hs-SRP-pkn           | 47   | 49.15       | 49.15       | 681.41   | 0.31   |

TABLE 4. Memory usage comparison - continued

| Name          | Len. | Memory (MB) |             |          |        |
|---------------|------|-------------|-------------|----------|--------|
|               |      | HFold       | Iter. HFold | HotKnots | IPknot |
| Bt-PrP        | 45   | 49.10       | 49.10       | 303.82   | 0.59   |
| HIV-1-RT-2-3a | 45   | 49.10       | 49.10       | 39.97    | 0.33   |
| Hs-Prp        | 45   | 49.10       | 49.10       | 186.98   | 0.31   |
| minimalIBV    | 45   | 49.10       | 49.10       | 162.06   | 0.30   |
| HIV-1-RT-2-2b | 42   | 49.04       | 49.04       | 20.13    | 0.26   |
| HIV-1-RT-2-6b | 42   | 49.04       | 49.04       | 29.99    | 0.27   |
| Ni-VS         | 42   | 49.04       | 49.04       | 79.84    | 0.28   |
| HIV-1-RT-2-5a | 41   | 49.01       | 49.01       | 66.23    | 0.27   |
| HIV-1-RT-1-8  | 39   | 48.97       | 48.97       | 16.75    | 0.24   |
| HIV-1-RT-2-1b | 39   | 48.97       | 48.97       | 23.33    | 0.26   |
| SRV-1         | 38   | 48.95       | 48.95       | 220.73   | 0.34   |
| TMV-L         | 38   | 48.95       | 48.95       | 368.74   | 0.25   |
| HIV-1-RT-1-1  | 37   | 48.93       | 48.93       | 46.26    | 0.26   |
| HIV-1-RT-1-17 | 37   | 48.93       | 48.93       | 49.33    | 0.24   |
| HIV-1-RT-1-3a | 37   | 48.93       | 48.93       | 56.45    | 0.23   |
| HIV-1-RT-1-6  | 37   | 48.93       | 48.93       | 49.32    | 0.25   |
| HIV-1-RT-1-7  | 37   | 48.93       | 48.93       | 29.82    | 0.24   |
| HIV-1-RT-1-9b | 37   | 48.93       | 48.93       | 62.54    | 0.32   |
| HIV-1-RT-2-10 | 37   | 48.93       | 48.93       | 49.32    | 0.29   |
| HIV-1-RT-2-11 | 37   | 48.93       | 48.93       | 26.47    | 0.25   |
| HIV-1-RT-2-12 | 37   | 48.93       | 48.93       | 26.55    | 0.24   |
| HIV-1-RT-2-4a | 37   | 48.93       | 48.93       | 66.74    | 0.23   |
| HIV-1-RT-2-7a | 36   | 48.90       | 48.90       | 36.30    | 0.25   |
| pKA-A         | 36   | 48.90       | 48.90       | 76.08    | 0.32   |
| EIAV          | 35   | 48.88       | 48.88       | 65.99    | 0.23   |
| FIV           | 35   | 48.88       | 48.88       | 37.03    | 0.21   |
| HIVRT32       | 35   | 48.88       | 48.88       | 42.99    | 0.21   |
| HIVRT322      | 35   | 48.88       | 48.88       | 69.10    | 0.25   |
| HIVRT33       | 35   | 48.88       | 48.88       | 43.22    | 0.21   |
| HIV-1-RT-2-9  | 34   | 48.86       | 48.86       | 29.66    | 0.23   |
| MMTV          | 34   | 48.86       | 48.86       | 176.54   | 0.23   |
| MMTV-vpk      | 34   | 48.86       | 48.86       | 52.92    | 0.25   |
| MMTVgag-pro   | 34   | 48.86       | 48.86       | 252.39   | 0.23   |
| T2-gene32     | 33   | 48.84       | 48.84       | 23.32    | 0.22   |
| Ec-PK1        | 30   | 48.78       | 48.78       | 42.94    | 0.23   |
| LP-PK1        | 30   | 48.78       | 48.78       | 16.53    | 0.19   |
| BWYV          | 28   | 48.73       | 48.73       | 42.48    | 0.18   |
| PEMV          | 28   | 48.73       | 48.73       | 20.09    | 0.18   |
| T4-gene32     | 28   | 48.73       | 48.73       | 26.47    | 0.19   |
| BLV           | 27   | 48.71       | 48.71       | 42.56    | 0.18   |
| BYDV-NY-RPV   | 27   | 48.71       | 48.71       | 42.25    | 0.18   |
| CABYV         | 27   | 48.71       | 48.71       | 32.66    | 0.23   |
| BChV          | 26   | 48.69       | 48.69       | 29.43    | 0.17   |
| PLRV-S        | 26   | 48.69       | 48.69       | 36.06    | 0.18   |
| PLRV-W        | 26   | 48.69       | 48.69       | 35.89    | 0.17   |
